# Supplementary material for: Electrochemical reduction of NO catalyzed by boron-doped C60 fullerene: a first-principles study
Source: Royal Society of Chemistry journal article supplement (doi:10.1039/d1ra07403b), 2022-01-01

## “Supplementary Material”

### **Electrochemical reduction of NO catalyzed by boron-doped C<sub>60</sub> fullerene: a first-principles study**

**Nasibeh Saeidi<sup>a</sup>, Mehdi D. Esrafil<sup>\* b</sup>, Jaber Jahanbin Sardroodi<sup>a</sup>**

<sup>a</sup> Department of Chemistry, Azarbaijan Shahid Madani University, Tabriz, Iran

<sup>b</sup> Department of Chemistry, Faculty of Basic Sciences, University of Maragheh, P.O. Box 55136-553, Maragheh, Iran

\* Corresponding author. **E-mails:** [esrafil@maragheh.ac.ir](mailto:esrafil@maragheh.ac.ir) (M. D. Esrafil)

**Figure S1.** The adsorption of NO over C atoms of  $C_{59}B$ , and the corresponding adsorption energy, Gibbs free energy change and PDOS plots. Bond distances are in Å.

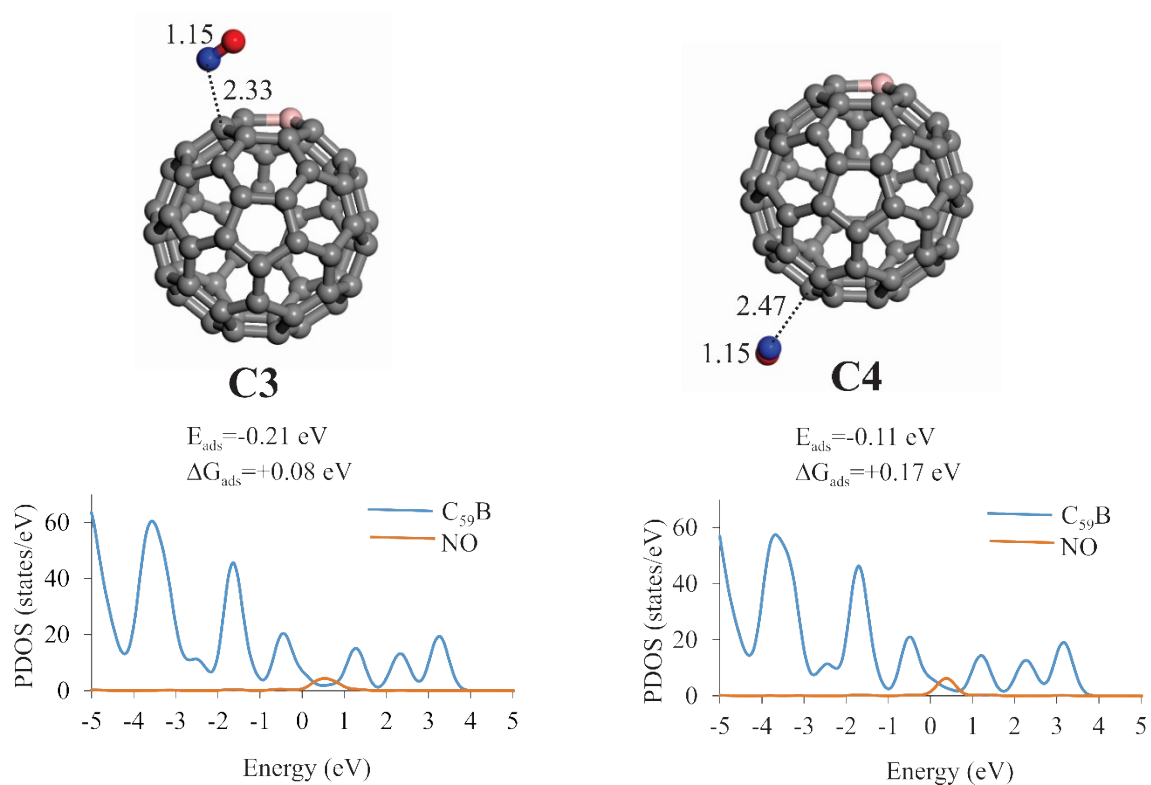

**Figure S2.** Free energy diagrams for the NOER to NH<sub>3</sub> over C<sub>59</sub>B at zero and applied potential through (a) P1-1, (b) P1-2, (c) P2-1 and (d) P2-2 pathways

(a)

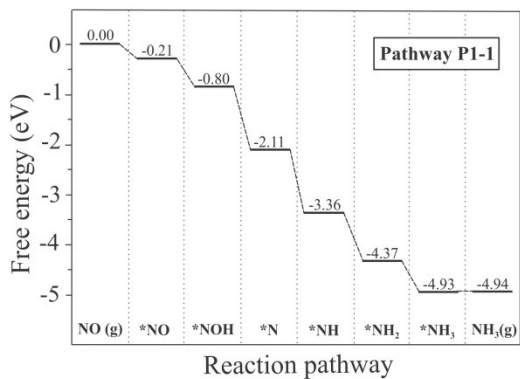

(b)

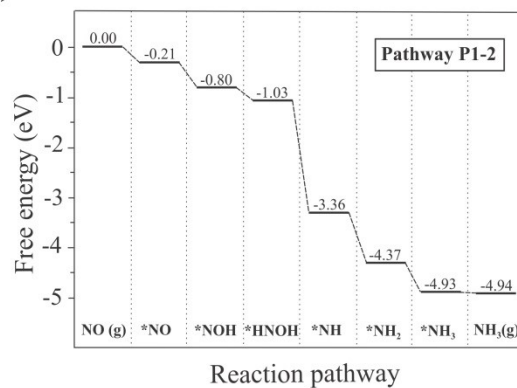

(c)

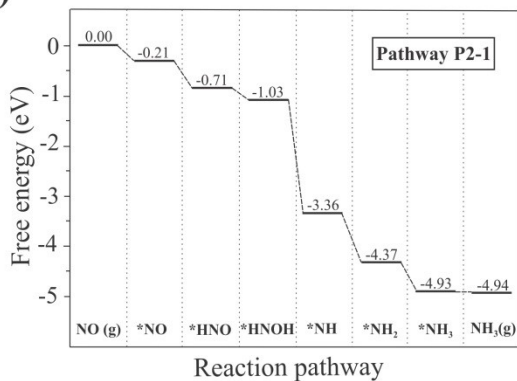

(d)

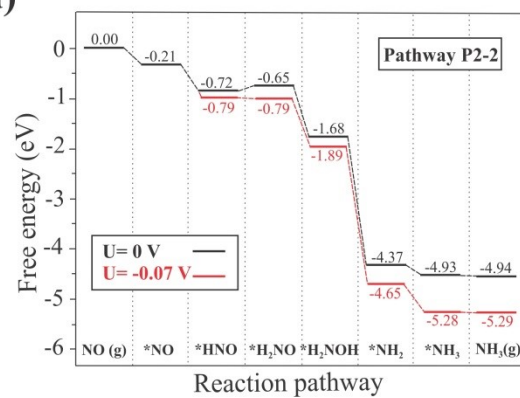

**Figure S3.** Reaction energy diagrams of NOER process over  $C_{59}B$  along (a) P1-1, (b) P1-2, (c) P2-1 and (d) P2-2 pathways at low NO coverage

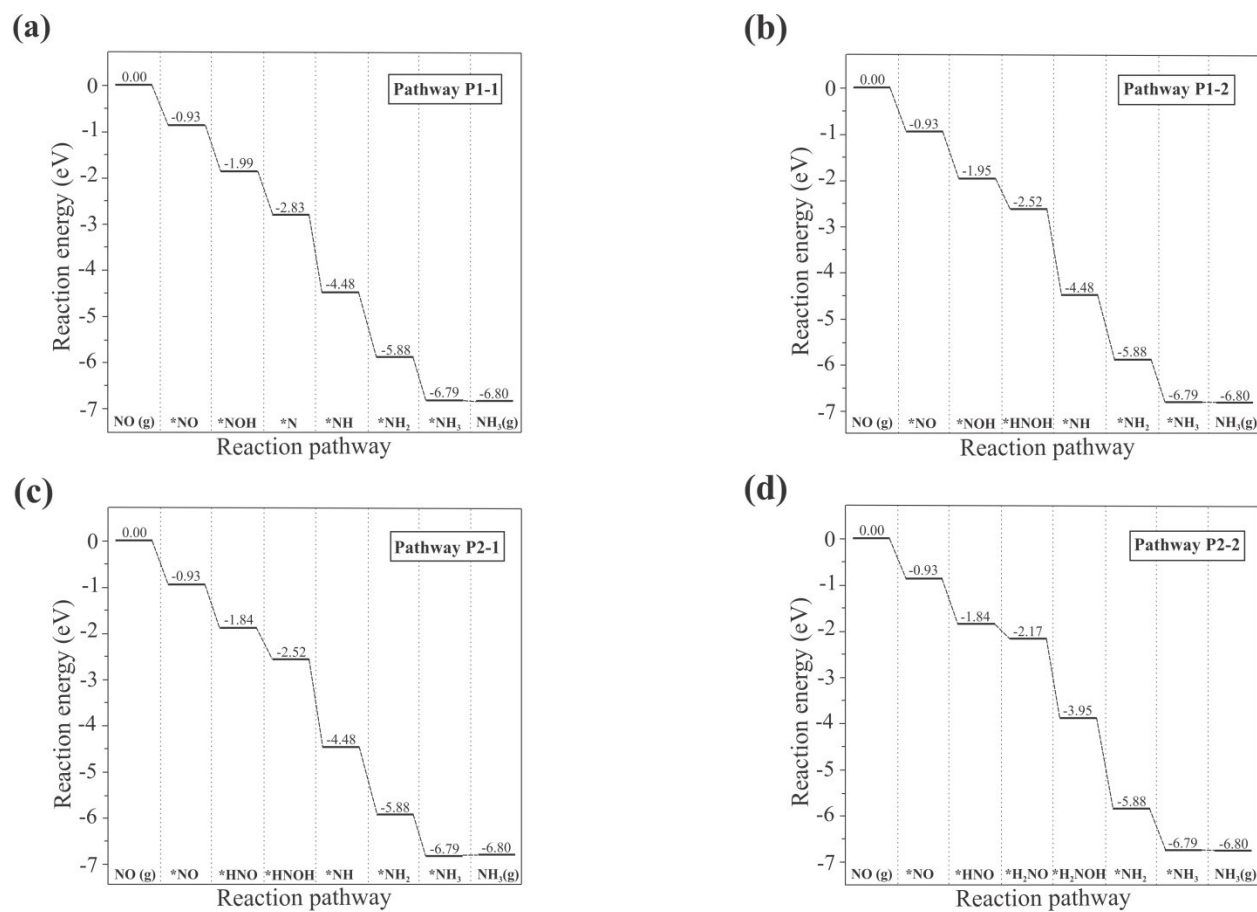

**Figure S4.** Reaction energy and free energy diagrams for NO conversion to N<sub>2</sub>O catalyzed by C<sub>59</sub>B

**(a)**

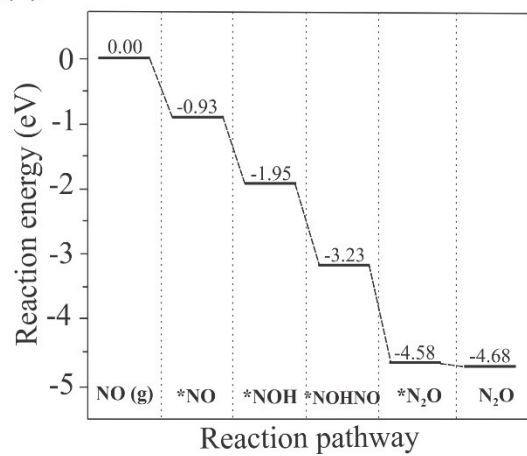

**(b)**

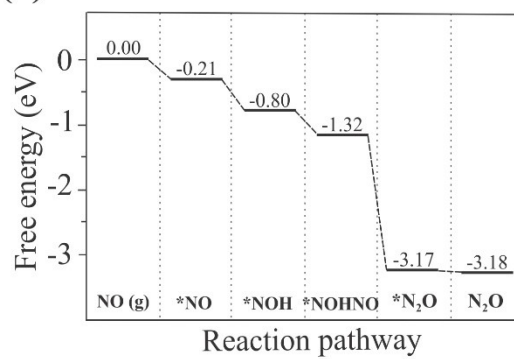

Supplement: d1ra07403b1.pdf [file d1ra07403b1.pdf]
